# Supplementary material for: High-performance nanofibrous LaCoO3 perovskite cathode for solid oxide fuel cells fabricated via chemically assisted electrodeposition
Source: Royal Society of Chemistry journal article supplement (doi:10.1039/c7ta10701c), 2018-01-01

Supplementary information for

High-performance nanofibrous LaCoO<sub>3</sub> perovskite cathode for solid oxide fuel cells fabricated via chemically assisted electrodeposition

Saeed ur Rehman<sup>a,b</sup>, Rak-Hyun Song<sup>a,b</sup>, Tak-Hyoung Lim<sup>a,b</sup>, Seok-Joo Park<sup>a,b</sup>, Jong-Eun Hong<sup>a</sup>,  
Jong-Won Lee<sup>c,\*</sup>, Seung-Bok Lee<sup>a,b\*</sup>

<sup>a</sup> *Fuel Cell Laboratory, New and Renewable Energy Research Division, Korea Institute of Energy Research, 152 Gajeong-ro, Yuseong-gu, Daejeon 34129, Republic of Korea*

<sup>b</sup> *Department of Advanced Energy and Technology, Korea University of Science and Technology, 217 Gajeong-ro, Yuseong-gu, Daejeon 34113, Republic of Korea*

<sup>c</sup> *Department of Materials Science and Engineering, Chosun University, 309 Pilmun-daero, Dong-gu, Gwangju 61452, Republic of Korea*

\* Corresponding authors:

*E-mail address:* sblee@kier.re.kr (S.-B. Lee)

*E-mail address:* jongwon@chosun.ac.kr (J.-W. Lee)

## Fabrication of solid oxide fuel cell

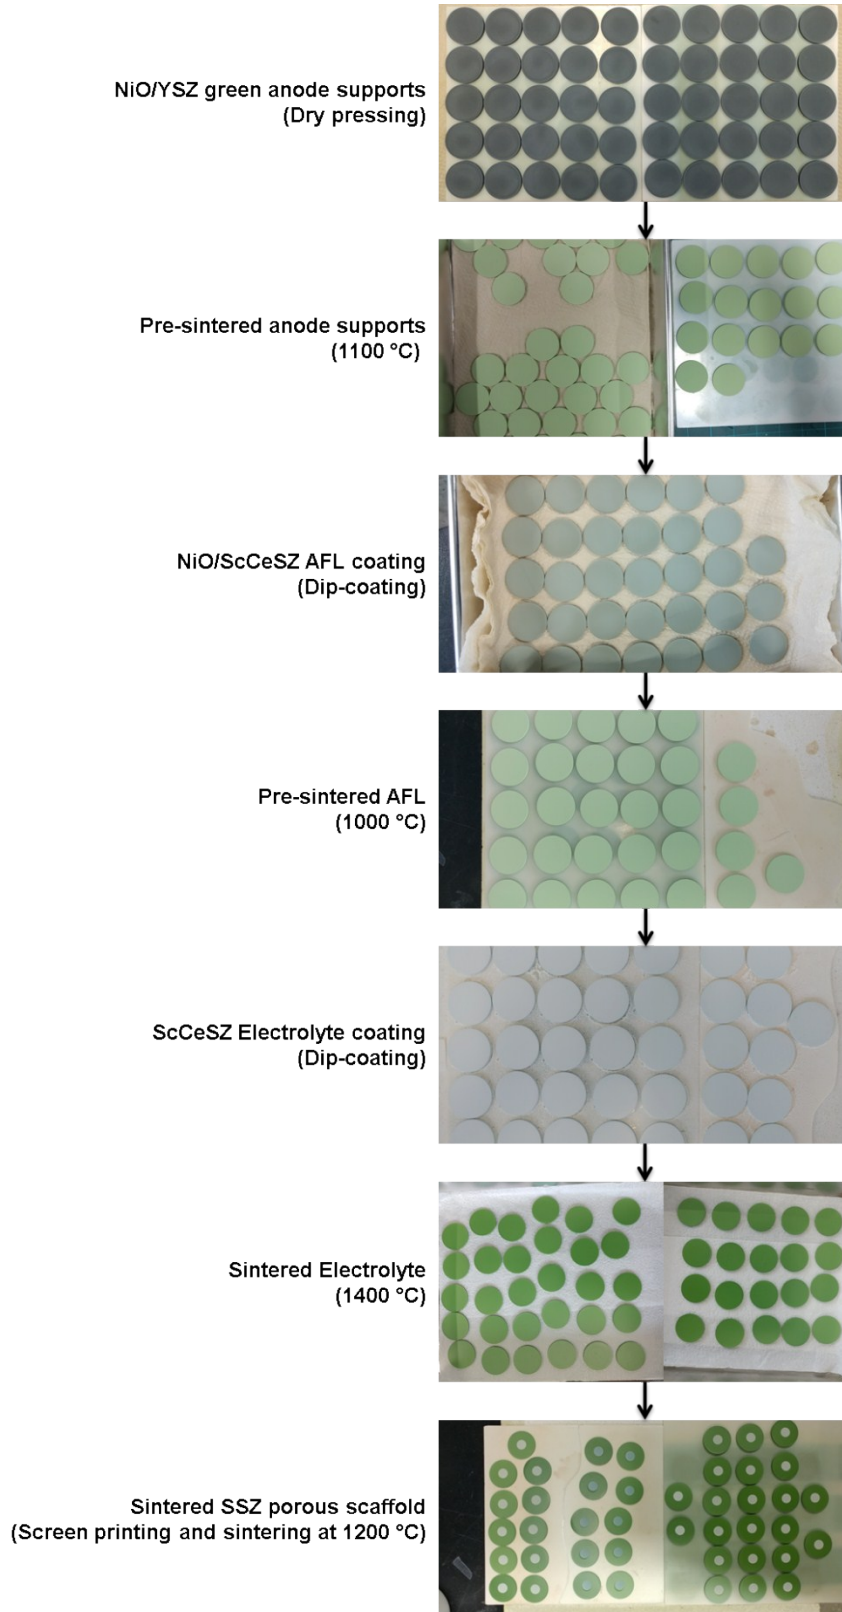

Cross sectional SEM image of the SOFC

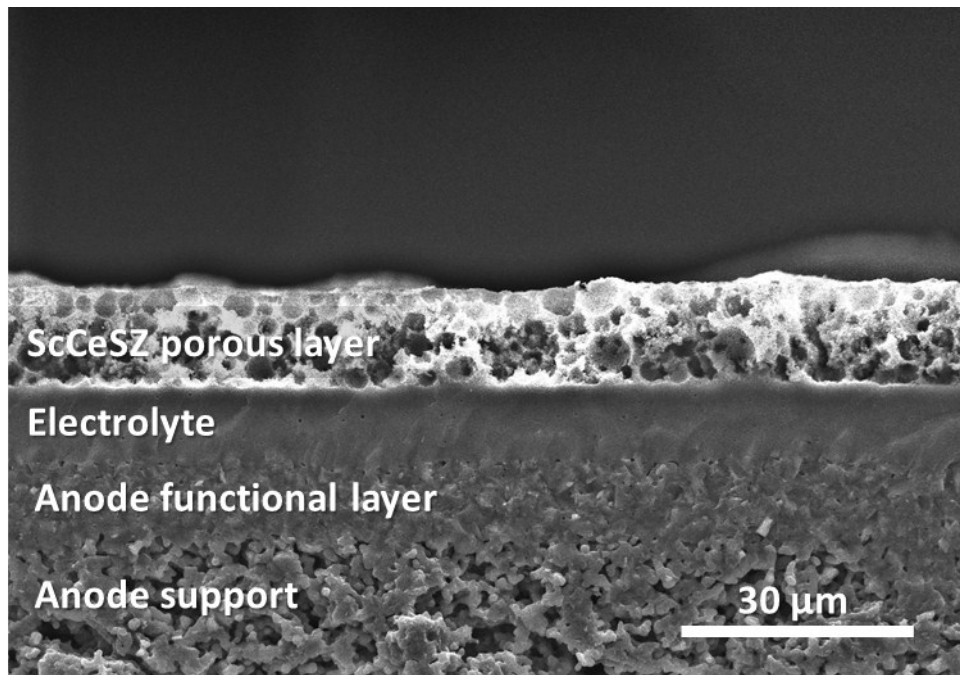

Fabrication of CNT template

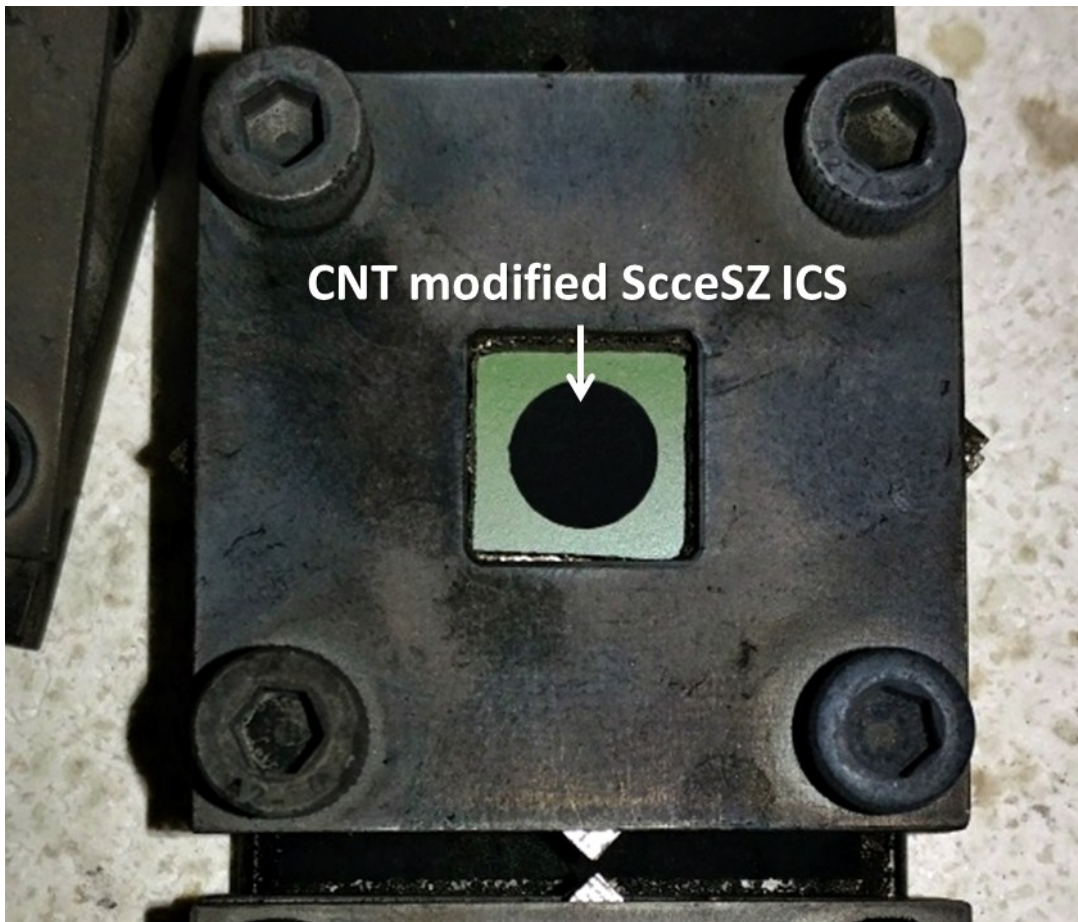

Cross sectional SEM of CNT deposited ScCeSZ framework

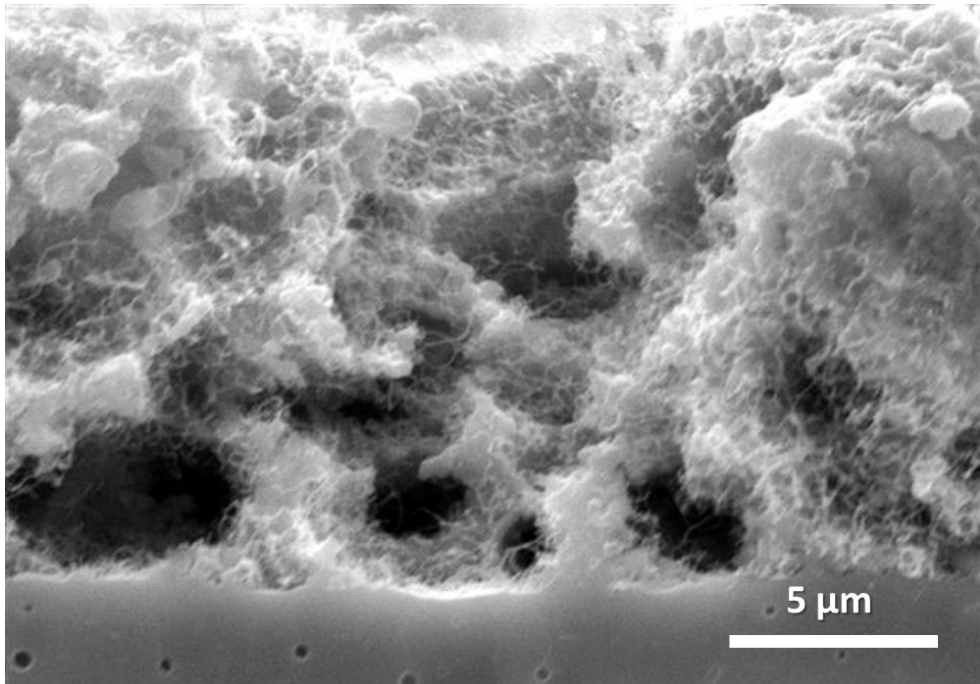

### EDS analysis results of LCO1 cathode

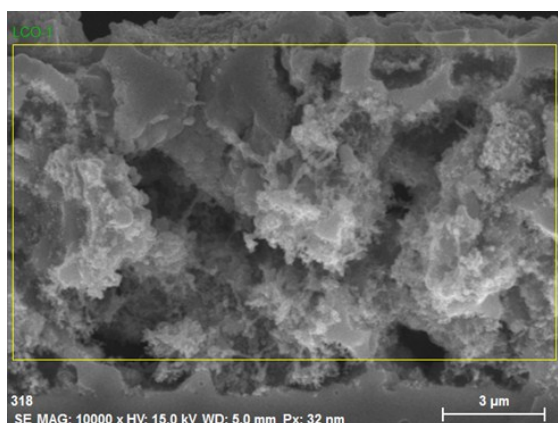

Spectrum: LCO-1

| El     | AN | Series   | unn. [wt.%] | C [at.%] | Atom. C Error (1 Sigma) [wt.%] |
|--------|----|----------|-------------|----------|--------------------------------|
| Zr     | 40 | L-series | 42.98       | 19.21    | 1.53                           |
| O      | 8  | K-series | 24.94       | 63.54    | 3.13                           |
| La     | 57 | L-series | 14.70       | 4.31     | 0.44                           |
| Co     | 27 | K-series | 13.09       | 9.06     | 0.43                           |
| Sc     | 21 | K-series | 4.28        | 3.88     | 0.16                           |
| Os     | 76 | M-series | 0.00        | 0.00     | 0.00                           |
| Total: |    |          | 100.00      | 100.00   |                                |

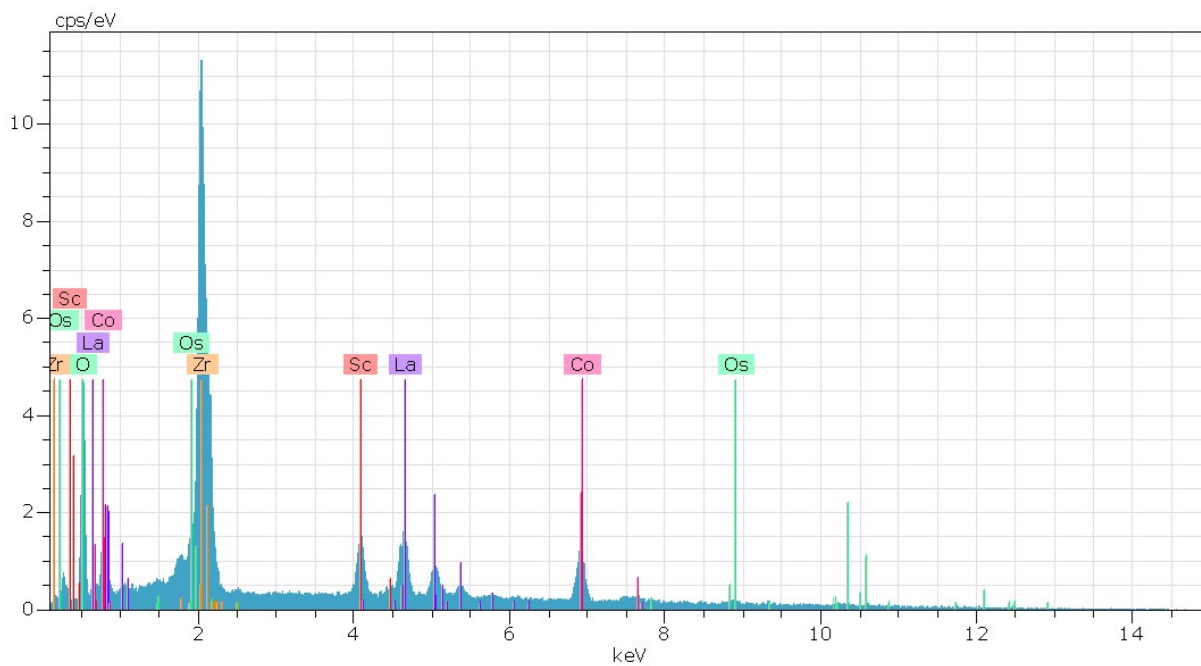

### EDS analysis results of LCO2 cathode

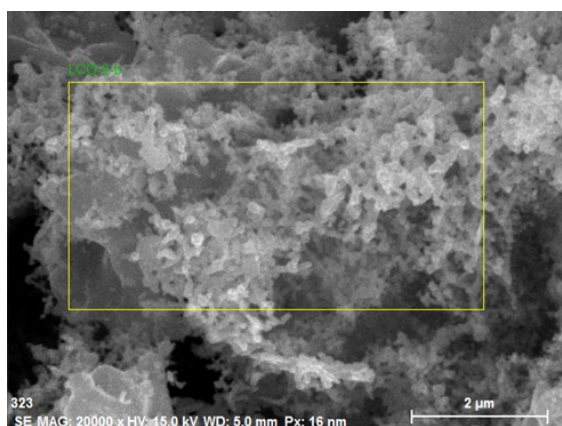

Spectrum: LCO-2-b

| El     | AN | Series   | unn. C [wt.%] | Atom. C [at.%] | Error (1 Sigma) [wt.%] |
|--------|----|----------|---------------|----------------|------------------------|
| Zr     | 40 | L-series | 46.73         | 22.55          | 1.67                   |
| O      | 8  | K-series | 21.58         | 59.37          | 2.79                   |
| La     | 57 | L-series | 15.48         | 4.91           | 0.46                   |
| Co     | 27 | K-series | 11.66         | 8.71           | 0.39                   |
| Sc     | 21 | K-series | 4.55          | 4.45           | 0.16                   |
| Os     | 76 | M-series | 0.00          | 0.00           | 0.00                   |
| Total: |    |          | 100.00        | 100.00         |                        |

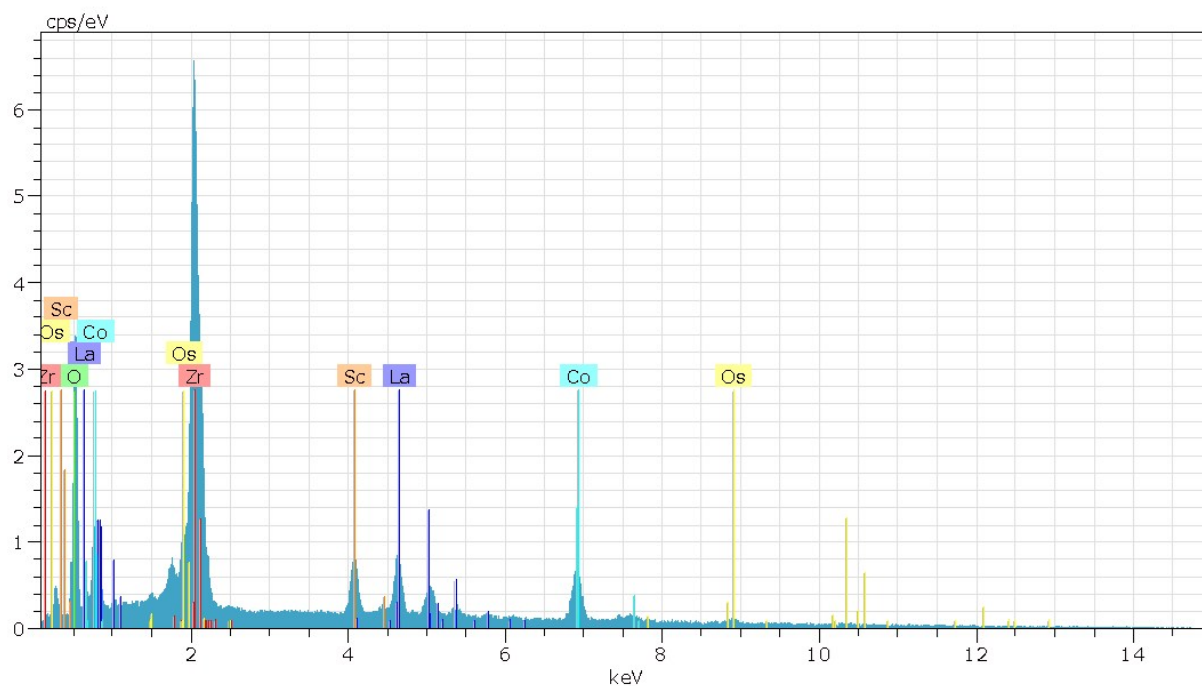

### EDS analysis results of LCO3 cathode

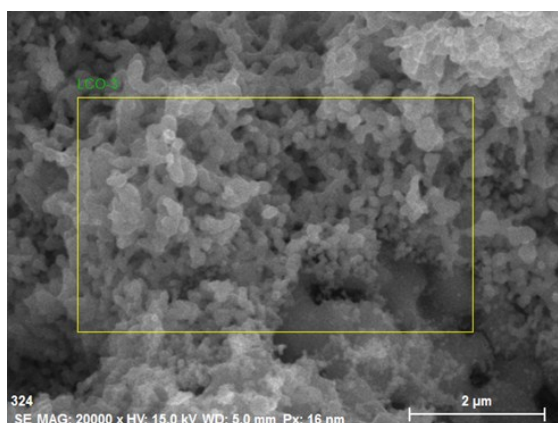

Spectrum: LCO-3

| El            | AN | Series   | unn. [wt.%]   | C Atom. [at.%] | Error (1 Sigma) [wt.%] |
|---------------|----|----------|---------------|----------------|------------------------|
| Zr            | 40 | L-series | 33.34         | 14.55          | 1.15                   |
| O             | 8  | K-series | 27.28         | 67.85          | 3.22                   |
| La            | 57 | L-series | 25.12         | 7.20           | 0.70                   |
| Co            | 27 | K-series | 10.61         | 7.16           | 0.35                   |
| Sc            | 21 | K-series | 3.66          | 3.24           | 0.13                   |
| Os            | 76 | M-series | 0.00          | 0.00           | 0.00                   |
| <b>Total:</b> |    |          | <b>100.00</b> | <b>100.00</b>  |                        |

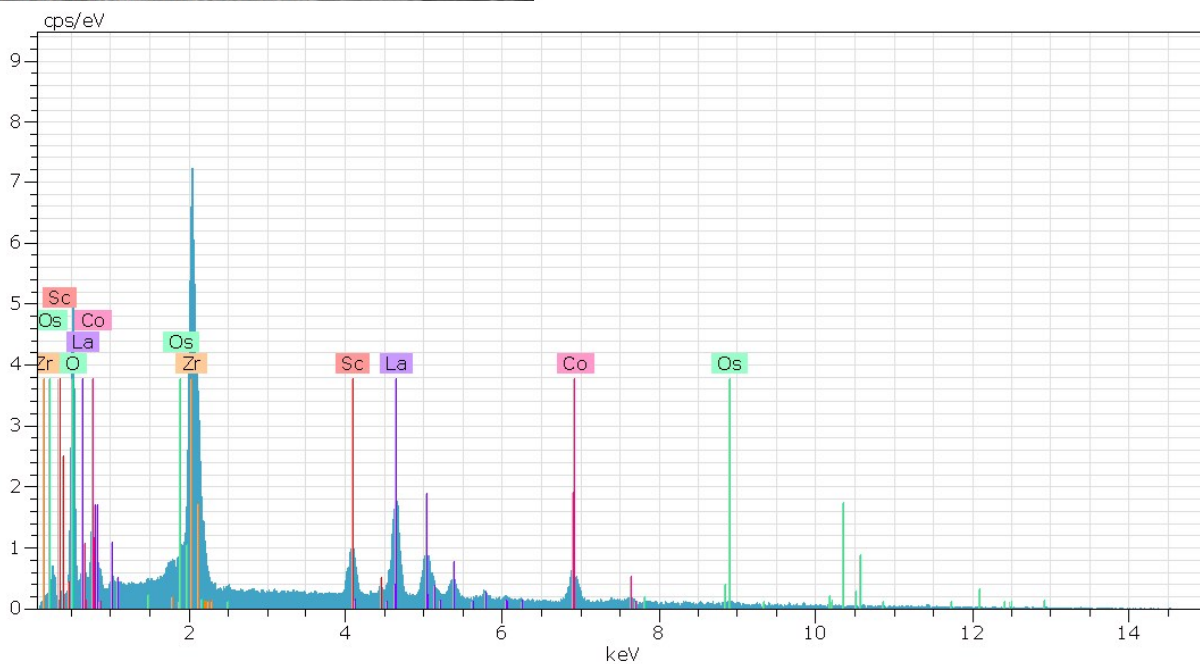



### EDS analysis results of LCO4 cathode

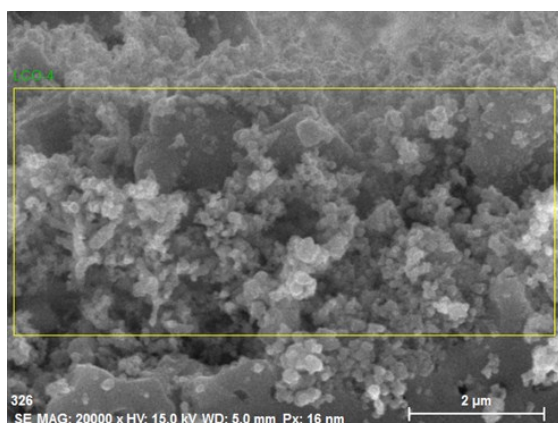

Spectrum: LCO-4

| El     | AN | Series   | unn. [wt.%] | C Atom. [at.%] | C Error (1 Sigma) [wt.%] |
|--------|----|----------|-------------|----------------|--------------------------|
| Zr     | 40 | L-series | 34.63       | 15.54          | 1.22                     |
| La     | 57 | L-series | 26.23       | 7.73           | 0.74                     |
| O      | 8  | K-series | 26.14       | 66.88          | 3.17                     |
| Co     | 27 | K-series | 9.21        | 6.40           | 0.32                     |
| Sc     | 21 | K-series | 3.78        | 3.44           | 0.14                     |
| Os     | 76 | M-series | 0.00        | 0.00           | 0.00                     |
| Total: |    |          | 100.00      | 100.00         |                          |

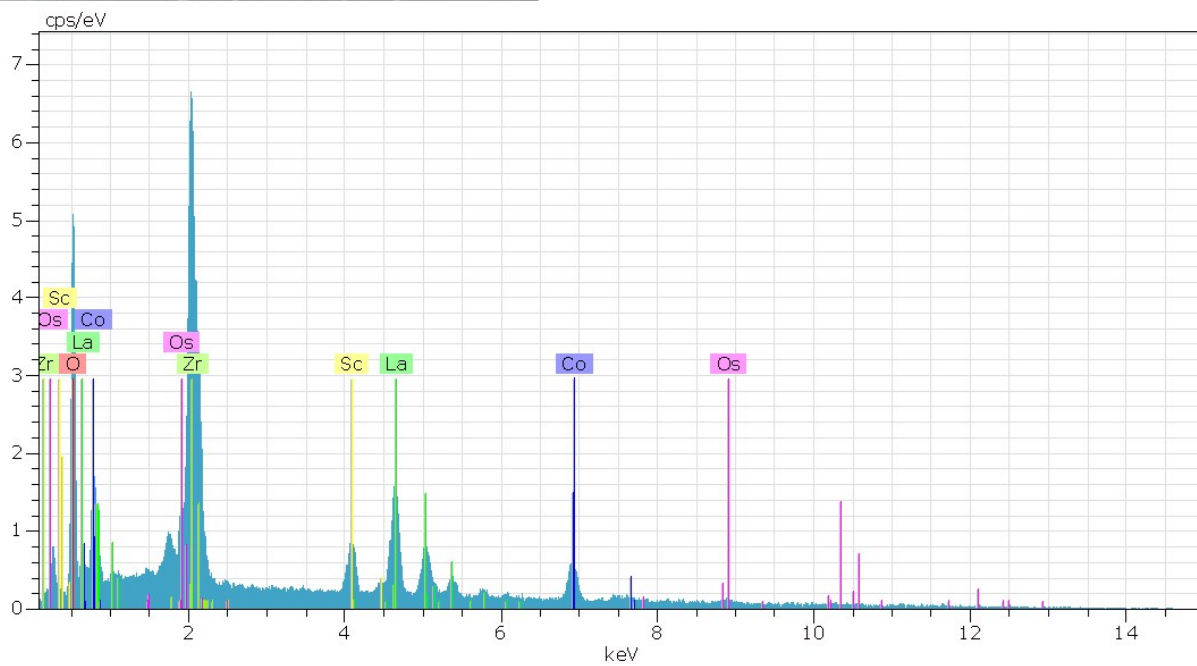

### EDS analysis results of LCO5 cathode

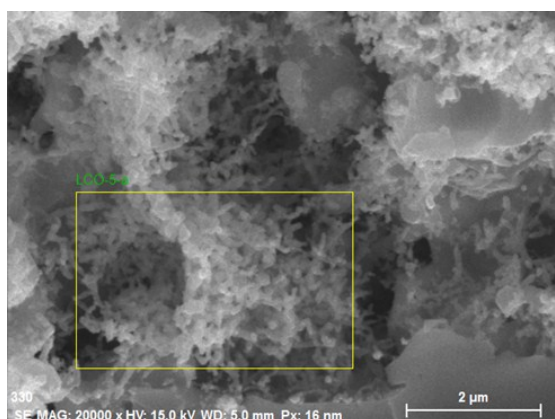

Spectrum: LCO-5-a

| El     | AN | Series   | unn. [wt.%] | C Atom. [at.%] | C Error (1 Sigma) [wt.%] |
|--------|----|----------|-------------|----------------|--------------------------|
| Zr     | 40 | L-series | 54.79       | 36.81          | 2.21                     |
| La     | 57 | L-series | 22.89       | 10.10          | 0.74                     |
| O      | 8  | K-series | 10.23       | 39.20          | 1.70                     |
| Co     | 27 | K-series | 8.02        | 8.34           | 0.31                     |
| Sc     | 21 | K-series | 4.07        | 5.55           | 0.16                     |
| Os     | 76 | M-series | 0.00        | 0.00           | 0.00                     |
| Total: |    |          | 100.00      | 100.00         |                          |

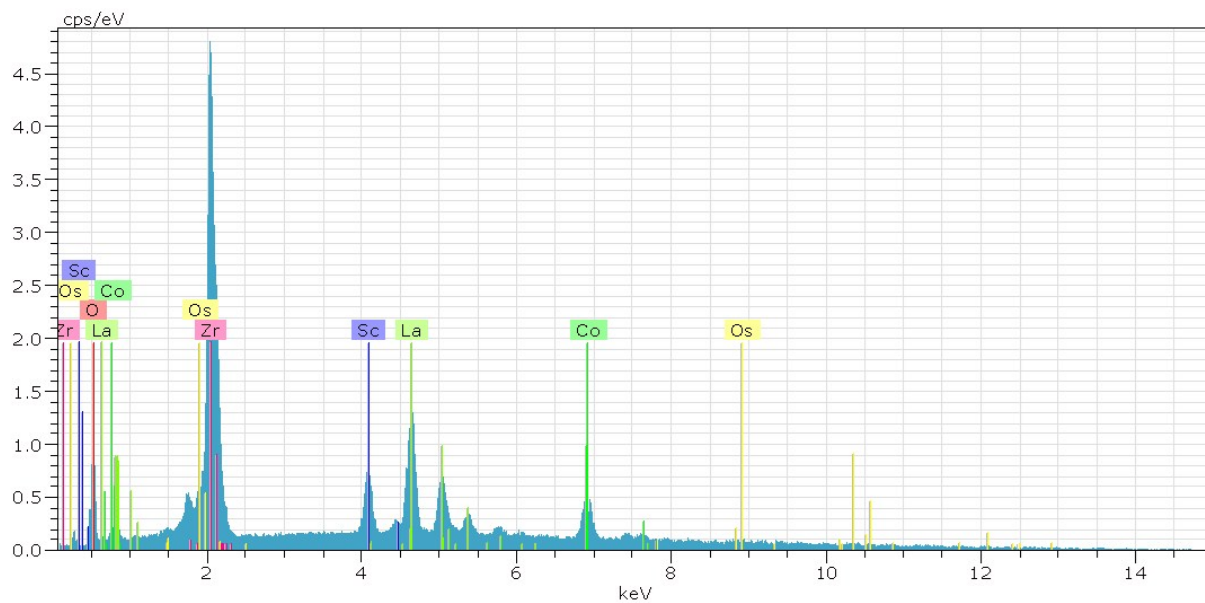

Cross sectional SEM of SOFC with LCO2 cathode after 200 h of polarization test

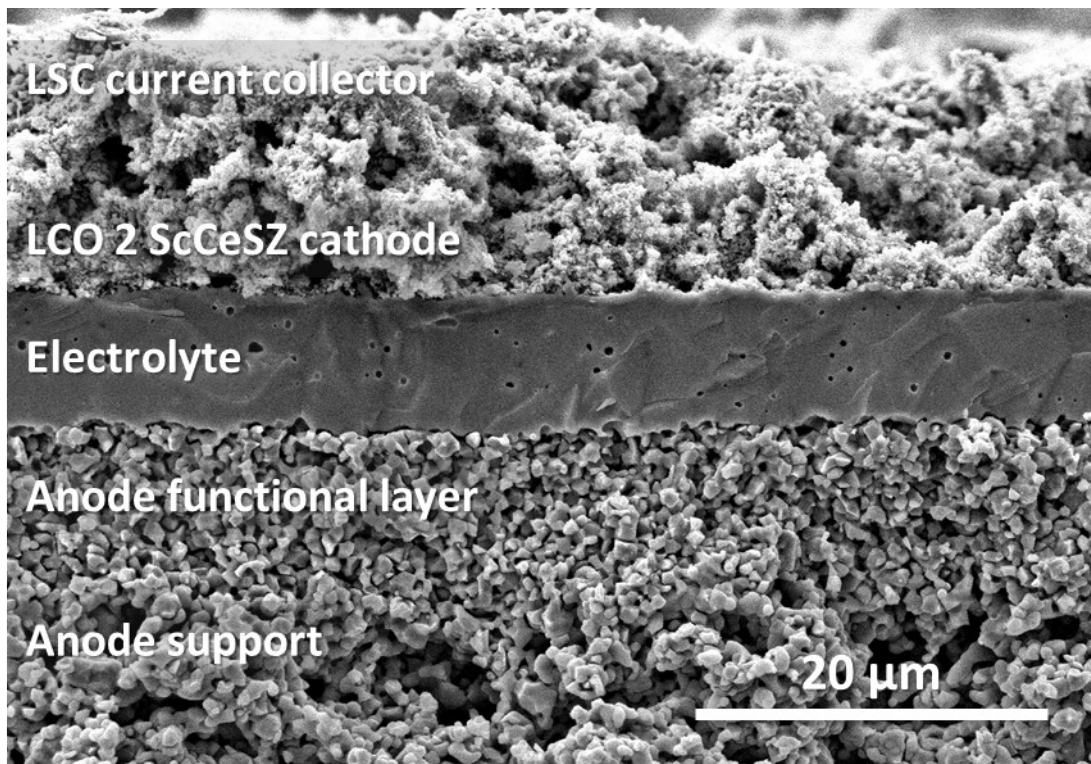

Supplement: c7ta10701c1.pdf [file c7ta10701c1.pdf]
